# Supplementary material
Source: Elsevier journal article supplement (https://www.sciencedirect.com/science/article/pii/S0300289620300405)
Supplement: mmc1 [file S0300289620300405:mmc1.pdf]

## **Material suplementario**

### **Objetivo**

El objetivo principal de estas normativas sobre la neumonía adquirida en la comunidad (NAC) es proporcionar unas directrices que les permitan a los profesionales sanitarios tomar las mejores decisiones en la asistencia de los pacientes adultos con esta patología en base a un resumen crítico de la literatura más actualizada. Estas normativas no cubren la edad pediátrica o los pacientes con inmunosupresión primaria o secundaria.

Este documento se ha de leer como una actualización de aquellos aspectos de la práctica clínica que han cambiado a la luz de nuevas evidencias de calidad desde las anteriores normativas publicadas en el año 2010 [Menéndez 2010].

Estas normativas van dirigidas a médicos de familia de atención primaria y especializada, neumólogos, internistas y otros especialistas que atienden a los pacientes con neumonía adquirida en la comunidad.

### **MÉTODOS**

Para la elaboración de estas normativas se han seguido los siguientes pasos

#### **Constitución del grupo de trabajo**

El grupo de trabajo estuvo constituido por especialistas en neumología, con una amplia representación geográfica. La coordinación del documento ha sido a cargo de Rosario Menéndez. Se ha contado con la participación de un metodólogo experto y un documentalista del Centro Cochrane Iberoamericano, que han asesorado en el desarrollo de las normativas y han realizado la búsqueda sistemática de la literatura.

El documento se estructura en diferentes preguntas clínicas de interés y los miembros del grupo elaborador se han dividido en grupos de trabajo según su área de interés. Todos los miembros del grupo de trabajo han revisado y aprobado esta actualización de las Normativas NAC en su conjunto.

### **Formulación de preguntas clínicas**

Los miembros del grupo de trabajo priorizaron un total de 6 preguntas clínicas que esta actualización de las normativas debía contestar:

1. En el paciente hospitalizado, ¿es necesario realizar un estudio etiológico de la NAC completo, incluyendo virus y atípicas?
2. En la decisión de ingreso, ¿son útiles las escalas pronósticas clásicas de la NAC, o mejoran la predicción las escalas de sepsis?
3. En el tratamiento ambulatorio antibiótico, ¿hay que usar una combinación de betalactámico+macrolido o es suficiente monoterapia?
4. ¿Existe diferencias de eficacia en las actuales pautas recomendadas en el tratamiento antibiótico de la NAC hospitalizada?
5. En pacientes hospitalizados con NAC, ¿es seguro reducir el tratamiento a 5 días sin aumentar las complicaciones o recaídas o fracaso terapéutico?
6. En la prevención de la NAC, las nuevas vacunas conjugadas, ¿mejoran la eficacia en la población no inmunodeprimida?

### **Búsqueda bibliográfica**

Con la ayuda de un documentalista, se diseñó una estrategia de búsqueda de la literatura médica para identificar, en primer lugar, revisiones sistemáticas posteriores a la fecha de publicación de la anterior normativa SEPAR de NAC<sup>1</sup> y posteriormente

ensayos clínicos aleatorizados o estudios observacionales o de diagnóstico según la pregunta clínica. La búsqueda se realizó en MEDLINE (vía PubMed) desde enero de 2010 hasta julio de 2018. No se estableció ningún límite por idioma de publicación y para identificar los distintos tipos de diseños (revisiones sistemáticas y ensayos clínicos) se utilizaron filtros metodológicos validados.

La búsqueda identificó un total de 4.855 referencias de las cuales 304 eran revisiones sistemáticas y 266 ensayos clínicos. Los distintos grupos de trabajo recibieron estas referencias y seleccionaron los estudios de interés para cada pregunta clínica en base al título y el resumen y posteriormente se obtuvieron los artículos a texto completo. No se consideraron como referencia estudios publicados únicamente como resúmenes.

### **Estructura del documento**

Para cada pregunta clínica, estas normativas presentan la controversia actual que incluye las recomendaciones de la anterior Normativa NAC, un resumen de los principales hallazgos de la evidencia más actual, las directrices propuestas y donde no existe una evidencia definitiva se han propuesto los estudios necesarios para resolver estas lagunas de evidencia.

Estas normativas no han evaluado la calidad de la evidencia y tampoco han realizado una clasificación formal de la fuerza de las recomendaciones. La decisión final sobre las directrices presentadas fue tomada a partir de la discusión entre los miembros del grupo de trabajo y con el objetivo de que fueran útiles en la toma de decisiones clínicas diarias.

## Estrategia de búsqueda

|                                                                                                                                                                                                                                                                                                                                                            |       |
|------------------------------------------------------------------------------------------------------------------------------------------------------------------------------------------------------------------------------------------------------------------------------------------------------------------------------------------------------------|-------|
| "Pneumonia"[Mesh]                                                                                                                                                                                                                                                                                                                                          | 85571 |
| "Community-Acquired Infections"[Mesh]                                                                                                                                                                                                                                                                                                                      | 12784 |
| community acquired pneumonia [tiab]                                                                                                                                                                                                                                                                                                                        | 8662  |
| ("Pneumonia"[Mesh]) AND "Community-Acquired Infections"[Mesh]                                                                                                                                                                                                                                                                                              | 6605  |
| (community acquired pneumonia [tiab]) OR (("Pneumonia"[Mesh]) AND "Community-Acquired Infections"[Mesh])                                                                                                                                                                                                                                                   | 10124 |
| (community acquired pneumonia [tiab]) OR (("Pneumonia"[Mesh]) AND "Community-Acquired Infections"[Mesh]) Filters: Publication date from 2010/01/01                                                                                                                                                                                                         | 4855  |
| (community acquired pneumonia [tiab]) OR (("Pneumonia"[Mesh]) AND "Community-Acquired Infections"[Mesh]) Filters: Systematic Reviews; Publication date from 2010/01/01                                                                                                                                                                                     | 304   |
| ((community acquired pneumonia [tiab]) OR (("Pneumonia"[Mesh]) AND "Community-Acquired Infections"[Mesh])) AND ((randomized controlled trial[pt] OR controlled clinical trial[pt] OR placebo[tiab] OR clinical trials as topic[mesh]: noexp) OR randomly[tiab] OR trial[ti]) NOT (animals [mh] NOT humans [mh])) Filters: Publication date from 2010/01/01 | 266   |

## Bibliografía

1. Menéndez R, Torres A, Aspa J, Capelastegui A, Prat C, Rodríguez de Castro F.

Neumonía adquirida en la comunidad. Nueva normativa de la Sociedad Española de Neumología y Cirugía Torácica (SEPAR). Arch Bronconeumol. 2010;46:543-58.

[\[Medline\]](#)

## Conflictos de interés

Tanto los coordinadores como todos los miembros del grupo de trabajo han hecho una declaración de todas las relaciones con la industria que pudieran representar un potencial conflicto de interés al inicio del proyecto y antes de la publicación del mismo.

## RESULTADOS

**Tabla 1.** Resultados principales de los estudios que evalúan la capacidad predictiva de la escala q-SOFA en la NAC

| Autor, año referencia       | Diseño                                                            | Pacientes | Resultado analizado                                                            | Escalas comparadas                              | Hallazgos/conclusiones                                                                                                                                |
|-----------------------------|-------------------------------------------------------------------|-----------|--------------------------------------------------------------------------------|-------------------------------------------------|-------------------------------------------------------------------------------------------------------------------------------------------------------|
| Kolditz, 2016 <sup>35</sup> | Análisis base de datos CAPNETZ                                    | 9.327     | Mortalidad 30 días<br>Necesidad ventilación mecánica<br>Necesidad vasopresores | CRB-65                                          | Predicción similar para los resultados analizados                                                                                                     |
| Chen, 2016 <sup>36</sup>    | Retrospectivo unicéntrico                                         | 1.641     | Mortalidad a los 28 días<br>Hospitalización<br>Ingreso en UCI                  | CRB-65<br>CRB                                   | AUC de las curvas ROC similares para las tres escalas; q-SOFA mejor que CRB-65 para identificar pacientes de alto riesgo que requieren ingreso en UCI |
| Müller, 2017 <sup>38</sup>  | Retrospectivo unicéntrico                                         | 527       | Mortalidad intrahospitalaria<br>Ingreso en UCI                                 | CURB-65<br>SIRS                                 | Predicción similar para mortalidad intrahospitalaria; q-SOFA mejor que CURB-65 para predicción ingreso en UCI                                         |
| Kim, 2017 <sup>37</sup>     | Retrospectivo unicéntrico                                         | 125       | Mortalidad a los 28 días                                                       | PSI<br>CURB-65<br>IDSA/ATS<br>APACHE II<br>SOFA | Predicción similar para mortalidad a los 28 días                                                                                                      |
| Ranzani, 2017 <sup>39</sup> | Análisis secundario estudio observacional prospectivo dos centros | 6.874     | Mortalidad intrahospitalaria                                                   | PSI<br>CURB-65<br>CRB<br>m-SOFA<br>SIRS         | CRB y CRB65 mejor que q-SOFA en algunos escenarios (mayor beneficio neto para algunos valores de número de pacientes dispuestos a tratar)             |
| Tokioka, 2018 <sup>40</sup> | Análisis secundario estudio observacional prospectivo unicéntrico | 1.045     | Mortalidad intrahospitalaria<br>Ingreso en UCI                                 | PSI<br>CURB-65                                  | Predicción similar de las escalas CURB-65 y PSI                                                                                                       |
| Zhou, 2018 <sup>41</sup>    | Prospectivo unicéntrico                                           | 226       | Mortalidad a los 28 días                                                       | CURB-65<br>PSI                                  | CURB-65 y PSI mejor que q-SOFA                                                                                                                        |

q-SOFA: *quick-Sequential Organ Failure Assessment*; NAC: neumonía adquirida en la comunidad; CRB-65: *confusion* (confusión), *respiratory rate* (frecuencia respiratoria), *blood pressure* (presión arterial), *65 years of age or older* (65 años de edad o más); CRB: *confusion* (confusión), *respiratory rate* (frecuencia respiratoria), *blood pressure* (presión arterial); UCI: unidad de cuidados intensivos; AUC: área bajo de la curva; ROC: característica operativa del receptor; SIRS: *Systemic Inflammatory Response System*; PSI: *Pneumonia Severity Index* (índice de gravedad de la neumonía); IDSA/ATS: *Infectious Diseases Society of America/American Thoracic Society*; APACHE II: *Acute Physiology Chronic Health Evaluation*; SOFA: *Sequential Organ Failure Assessment*; m-SOFA: modified SOFA (SOFA modificado).

**Tabla 2.** Datos de los metaanálisis acerca de la duración del tratamiento antibiótico en pacientes con NAC

| Autor, año referencia         | Número de RCTs           | Población                                                                                                | Comparación                                                                                                                            | Principales hallazgos                                                                                                                                                                                                                                                                                                                                                                                                                                                                      |
|-------------------------------|--------------------------|----------------------------------------------------------------------------------------------------------|----------------------------------------------------------------------------------------------------------------------------------------|--------------------------------------------------------------------------------------------------------------------------------------------------------------------------------------------------------------------------------------------------------------------------------------------------------------------------------------------------------------------------------------------------------------------------------------------------------------------------------------------|
| Li, 2007 <sup>65</sup>        | 15                       | 2.796 pacientes<br><br>Ingresados Ambulatorios<br><br>Gravedad: Leve-moderada                            | $\leq 7$ días <i>versus</i> $>7$ días antibiótico<br>En 3 estudios compararon entre mismo régimen de antibiótico                       | <u>Objetivo primario:</u><br>Fracaso: sin diferencia (RR 0,89; IC del 95% 0,78-1,02)<br><u>Objetivos secundarios:</u><br>Mortalidad: sin diferencia (RR 0,81; IC del 95% 0,46-1,43)<br>Erradicación: sin diferencia (RR 1,11; IC del 95% 0,76-1,62)<br>Efectos adversos: sin diferencia (RR 0,86; IC del 95% 0,71-1,04)                                                                                                                                                                    |
| Dimopoulos 2008 <sup>66</sup> | 5 adultos<br>2 niños     | 5.444 pacientes<br><br>Ingresados Ambulatorios<br><br>Gravedad: Leve-moderada                            | $\leq 7$ días <i>versus</i> $\geq 2$ días de diferencia<br>Todos los estudios compararon entre mismo régimen y dosis de a antibiótico. | <u>Objetivos primario:</u><br>Curación clínica: sin diferencia (5.107 pacientes; OR 0,89; IC del 95% 0,74-1,07)<br><u>Objetivos secundarios:</u><br>Curación microbiológica: sin diferencia (409 pacientes. OR 1,03; IC del 95% 0,52-2,05).<br>Mortalidad: sin diferencia (5.438 pacientes. OR 0,57; IC del 95% 0,23-1,43)<br>Efectos adversos: sin diferencia (3.214 pacientes. OR 0,90; IC del 95% 0,72-1,13)<br>Recaída: sin diferencia (4187 pacientes. OR 1,15; IC del 95% 0,81-1,63) |
| Tansarli, 2018 <sup>67</sup>  | 19<br>2 no aleatorizados | 4.861 pacientes<br><br>Ingresados Ambulatorios<br><br>Gravedad: Leve-moderada<br>En 8 estudios no consta | $\leq 6$ días <i>versus</i> $\geq 7$ días<br><br>En 5 estudios compararon entre mismo régimen de antibiótico.                          | <u>Objetivos primarios:</u><br>Curación clínica: Tasas similares a pesar de gravedad y lugar de tratamiento. (4.069 pacientes; RR 0,98; IC del 95% 0,97-1,01)<br>Mortalidad: Inferior en el grupo de pauta corta. (2.802 pacientes; RR 0,52; IC del 95% 0,33-0,82)<br><u>Objetivos secundarios:</u><br>Efectos adversos: sin diferencia (1.923 pacientes; RR 0,73; IC del 95% 0,55-0,97)<br>Fracaso: sin diferencia (1.923 pacientes; RR 0,7; IC del 95% 0,30-1,46)                        |

NAC: neumonía adquirida en la comunidad; RCT: *randomised controlled clinical trial* (ensayo clínico aleatorizado y controlado); RR: riesgo relativo; OR: *odds ratio* (razón de oportunidades).

**Tabla 3.** Datos de metaanálisis acerca de la eficacia de la vacunación para la prevención de NAC

| Autor, año, referencia              | Número de estudios                                 | Vacuna estudiada | Hallazgos en ENI  | NAC neumococo                                         | Comentario                                                                  |
|-------------------------------------|----------------------------------------------------|------------------|-------------------|-------------------------------------------------------|-----------------------------------------------------------------------------|
| Kraicer-Melamed, 2016 <sup>83</sup> |                                                    | VPN23            | EV 50%            |                                                       | EV 4%                                                                       |
| Diao, 2016 <sup>86</sup>            | 7 ensayos aleatorizados                            | VPN23            | NA                | Tendencia a menor NAC y mortalidad                    | Débil efecto en la prevención NAC                                           |
| Schiffner-Rohe, 2016 <sup>84</sup>  | 5 estudios NAC<br>1 estudio NAC institucionalizada | VPN23            | NA                | No eficacia excepto en estudio NAC institucionalizada | No eficacia                                                                 |
| Falkenhorst, 2017 <sup>82</sup>     | 17 estudios                                        | VPN23            | EV 75%            | EV 48-64%                                             | Eficacia menor después de 2,5 años                                          |
| TinTin Htar, 2017 <sup>85</sup>     | 33 estudios                                        | VPN23            | NA                | 32-51% en <60 meses de vacunación                     | Cierta prevención precoz y eficacia no consistente                          |
| Walters, 2017 <sup>81</sup>         | Pacientes EPOC<br>12 ensayos randomizados          | VPN23<br>VCN13v  | NA                | OR 0,60 exacerbación<br>OR 0,62 para NAC              | Menor probabilidad de presentar NAC<br>Mortalidad cardiorrespiratoria igual |
| Latifi-Navid, 2018 <sup>87</sup>    | 21 estudios método bayesiano                       | VPN23            | Posible beneficio | Negativo                                              | No encuentra beneficio en prevenir neumonía ni muerte                       |

NAC: neumonía adquirida en la comunidad; VPN23: vacuna polisacárida antineumocócica 23 valente; ENI: enfermedad neumocócica invasiva; EV: eficacia vacunal; NA: no aplicable; VCN13v: vacuna conjugada antineumocócica 13 valente; OR: *odds ratio* (razón de oportunidades).
